# Supplementary material
Source: Springer Nature journal article supplement (https://www.springermedizin.de/resource/supplementary/12916_2010_369_MOESM8_ESM.pdf/9599806)

CPP

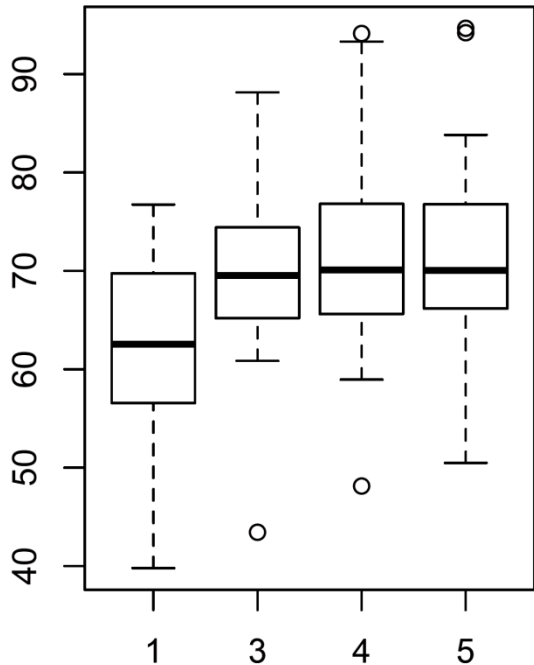

GOS levels

ICP

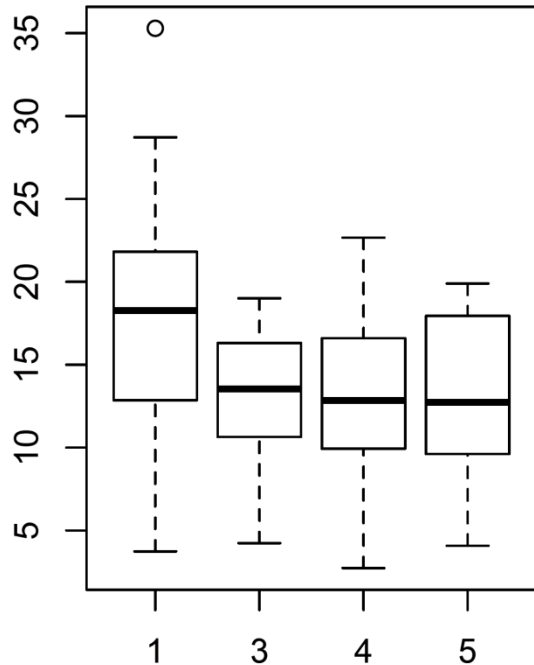

GOS levels

Supplement: MOESM8 [file 9599806]
